# Supplementary material for: Assessment of global DNA methylation in the first trimester fetal tissues exposed to maternal cigarette smoking
Source: PubMed Central journal article supplement (PMC5123323; doi:10.1186/s13148-016-0296-0), 2016-11-25
Supplement: 13148_2016_296_MOESM4_ESM.pdf [file 13148_2016_296_MOESM4_ESM.pdf]

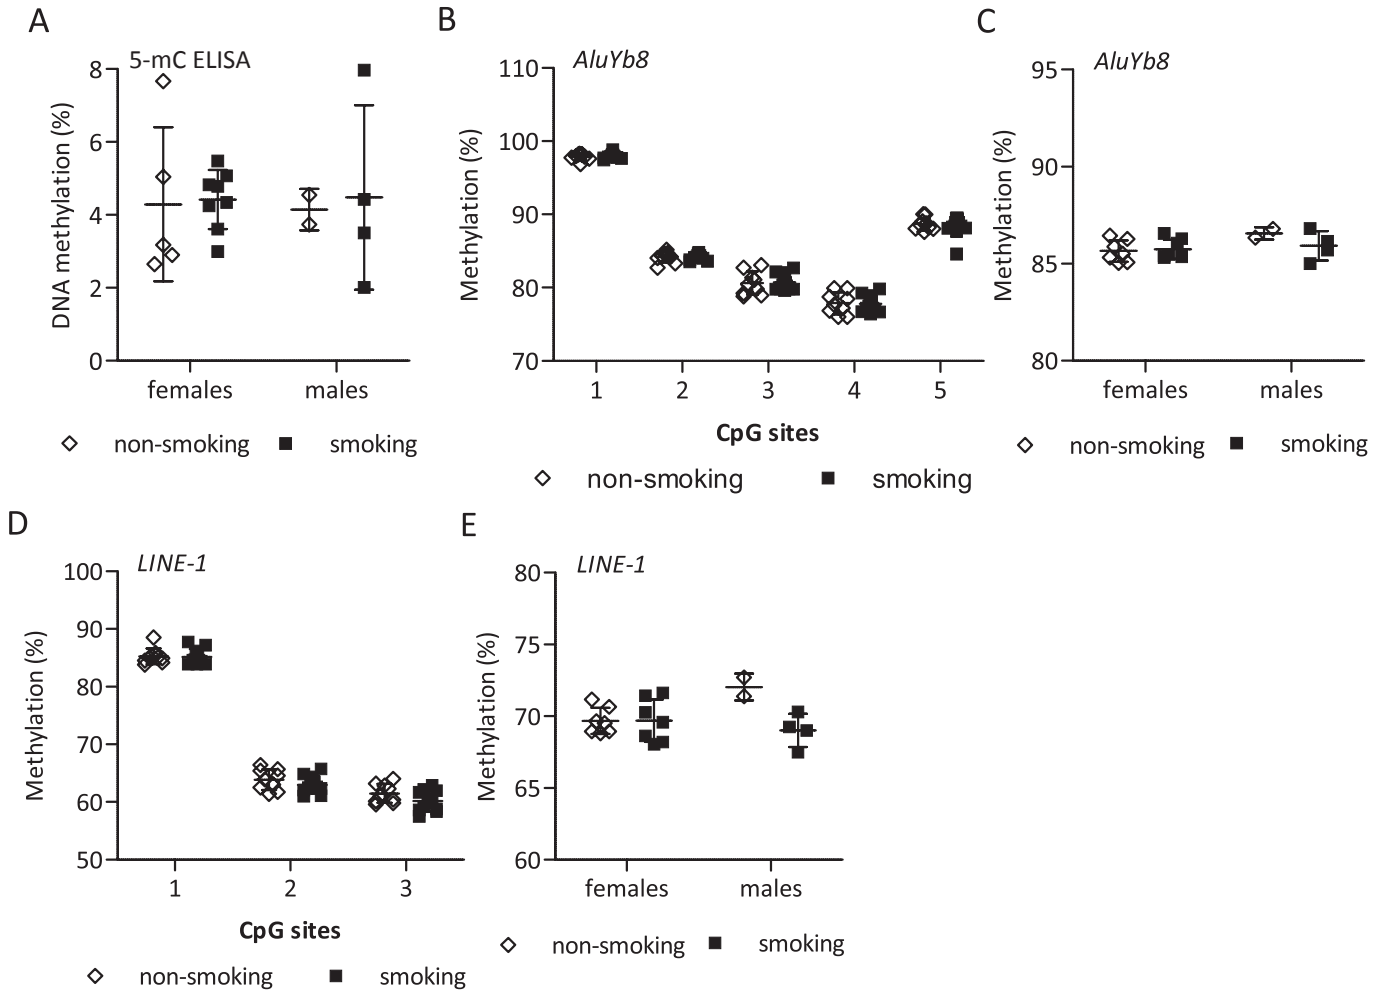

**FIG S3**
